# Supplementary material
Source: Springer Nature journal article supplement (https://www.springermedizin.de/resource/supplementary/12875_2012_747_MOESM1_ESM.pdf/9435224)
Supplement: MOESM1 [file 9435224]

|                 |
|-----------------|
| Ref ID: _____   |
| Author: _____   |
| Year: _____     |
| Reviewer: _____ |

## QUALITY ASSESSMENT TOOL FOR QUANTITATIVE STUDIES

### COMPONENT RATINGS

#### A) SELECTION BIAS

**(Q1) Are the individuals selected to participate in the study likely to be representative of the target population?**

- 1 Very likely
- 2 Somewhat likely
- 3 Not likely
- 4 Can't tell

**(Q2) What percentage of selected individuals agreed to participate?**

- 1 80 - 100% agreement
- 2 60 – 79% agreement
- 3 less than 60% agreement
- 4 Not applicable
- 5 Can't tell

|                                            |                    |                      |                  |
|--------------------------------------------|--------------------|----------------------|------------------|
| <b>RATE THIS SECTION</b><br>See dictionary | <b>STRONG</b><br>1 | <b>MODERATE</b><br>2 | <b>WEAK</b><br>3 |
|--------------------------------------------|--------------------|----------------------|------------------|

#### B) STUDY DESIGN

**Indicate the study design**

- 1 Randomized controlled trial
- 2 Controlled clinical trial
- 3 Cohort analytic (two group pre + post)
- 4 Case-control
- 5 Cohort (one group pre + post (before and after))
- 6 Interrupted time series
- 7 Other specify \_\_\_\_\_
- 8 Can't tell

**Was the study described as randomized? If NO, go to Component C.**

No Yes

**If Yes, was the method of randomization described? (See dictionary)**

No Yes

**If Yes, was the method appropriate? (See dictionary)**

No Yes

|                                            |                    |                      |                  |
|--------------------------------------------|--------------------|----------------------|------------------|
| <b>RATE THIS SECTION</b><br>See dictionary | <b>STRONG</b><br>1 | <b>MODERATE</b><br>2 | <b>WEAK</b><br>3 |
|--------------------------------------------|--------------------|----------------------|------------------|

**C) CONFOUNDERS**

**(Q1) Were there important differences between groups prior to the intervention?**

- 1 Yes
- 2 No
- 3 Can't tell

**The following are examples of confounders:**

- 1 Race
- 2 Sex
- 3 Marital status/family
- 4 Age
- 5 SES (income or class)
- 6 Education
- 7 Health status
- 8 Pre-intervention score on outcome measure

**(Q2) If yes, indicate the percentage of relevant confounders that were controlled (either in the design (e.g. stratification, matching) or analysis)?**

- 1 80 – 100%
- 2 60 – 79%
- 3 Less than 60%
- 4 Can't Tell

|                                            |                    |                      |                  |
|--------------------------------------------|--------------------|----------------------|------------------|
| <b>RATE THIS SECTION</b><br>See dictionary | <b>STRONG</b><br>1 | <b>MODERATE</b><br>2 | <b>WEAK</b><br>3 |
|--------------------------------------------|--------------------|----------------------|------------------|

**D) BLINDING**

**(Q1) Was (were) the outcome assessor(s) aware of the intervention or exposure status of participants?**

- 1 Yes
- 2 No
- 3 Can't tell

**(Q2) Were the study participants aware of the research question?**

- 1 Yes
- 2 No
- 3 Can't tell

|                                            |                    |                      |                  |
|--------------------------------------------|--------------------|----------------------|------------------|
| <b>RATE THIS SECTION</b><br>See dictionary | <b>STRONG</b><br>1 | <b>MODERATE</b><br>2 | <b>WEAK</b><br>3 |
|--------------------------------------------|--------------------|----------------------|------------------|

**E) DATA COLLECTION METHODS**

**(Q1) Were data collection tools shown to be valid?**

- 1 Yes
- 2 No
- 3 Can't tell

**(Q2) Were data collection tools shown to be reliable?**

- 1 Yes
- 2 No
- 3 Can't tell

|                                            |                    |                      |                  |
|--------------------------------------------|--------------------|----------------------|------------------|
| <b>RATE THIS SECTION</b><br>See dictionary | <b>STRONG</b><br>1 | <b>MODERATE</b><br>2 | <b>WEAK</b><br>3 |
|--------------------------------------------|--------------------|----------------------|------------------|

**F) WITHDRAWALS AND DROP-OUTS**

**(Q1) Were withdrawals and drop-outs reported in terms of numbers and/or reasons per group?**

- 1 Yes
- 2 No
- 3 Can't tell

**(Q2) Indicate the percentage of participants completing the study. (If the percentage differs by groups, record the lowest).**

- 1 80 -100%
- 2 60 - 79%
- 3 less than 60%
- 4 Can't tell

|                                            |                    |                      |                  |
|--------------------------------------------|--------------------|----------------------|------------------|
| <b>RATE THIS SECTION</b><br>See dictionary | <b>STRONG</b><br>1 | <b>MODERATE</b><br>2 | <b>WEAK</b><br>3 |
|--------------------------------------------|--------------------|----------------------|------------------|

**G) INTERVENTION INTEGRITY**

**(Q1) What percentage of participants received the allocated intervention or exposure of interest?**

- 1 80 -100%
- 2 60 - 79%
- 3 less than 60%
- 4 Can't tell

**(Q2) Was the consistency of the intervention measured?**

- 1 Yes
- 2 No
- 3 Can't tell

**(Q3) Is it likely that subjects received an unintended intervention (contamination or co-intervention) that may influence the results?**

- 4 Yes
- 5 No
- 6 Can't tell

**H) ANALYSES**

**(Q1) Indicate the unit of allocation (circle one)**

community    organization/institution    practice/office    individual

**(Q2) Indicate the unit of analysis (circle one)**

community    organization/institution    practice/office    individual

**(Q3) Are the statistical methods appropriate for the study design?**

- 1 Yes
- 2 No
- 3 Can't tell

**(Q4) Is the analysis performed by intervention allocation status (i.e. intention to treat) rather than the actual intervention received?**

- 1 Yes
- 2 No
- 3 Can't tell

**GLOBAL RATING**

**COMPONENT RATINGS**

Please transcribe the information from the gray boxes on pages 1-4 onto this page.

|          |                                 |                                            |                    |                      |                  |
|----------|---------------------------------|--------------------------------------------|--------------------|----------------------|------------------|
| <b>A</b> | <b>SELECTION BIAS</b>           | <b>RATE THIS SECTION</b><br>See dictionary | <b>STRONG</b><br>1 | <b>MODERATE</b><br>2 | <b>WEAK</b><br>3 |
| <b>B</b> | <b>STUDY DESIGN</b>             | <b>RATE THIS SECTION</b><br>See dictionary | <b>STRONG</b><br>1 | <b>MODERATE</b><br>2 | <b>WEAK</b><br>3 |
| <b>C</b> | <b>CONFOUNDERS</b>              | <b>RATE THIS SECTION</b><br>See dictionary | <b>STRONG</b><br>1 | <b>MODERATE</b><br>2 | <b>WEAK</b><br>3 |
| <b>D</b> | <b>BLINDING</b>                 | <b>RATE THIS SECTION</b><br>See dictionary | <b>STRONG</b><br>1 | <b>MODERATE</b><br>2 | <b>WEAK</b><br>3 |
| <b>E</b> | <b>DATA COLLECTION METHODS</b>  | <b>RATE THIS SECTION</b><br>See dictionary | <b>STRONG</b><br>1 | <b>MODERATE</b><br>2 | <b>WEAK</b><br>3 |
| <b>F</b> | <b>WITHDRAWALS AND DROPOUTS</b> | <b>RATE THIS SECTION</b><br>See dictionary | <b>STRONG</b><br>1 | <b>MODERATE</b><br>2 | <b>WEAK</b><br>3 |

**GLOBAL RATING FOR THIS PAPER (circle one):**

- 1      STRONG                      (four STRONG ratings with no WEAK ratings)
- 2      MODERATE                    (less than four STRONG ratings and one WEAK rating)
- 3      WEAK                              (two or more WEAK ratings)

With both reviewers discussing the ratings:

Is there a discrepancy between the two reviewers with respect to the component (A-F) ratings?

- No      Yes

If yes, indicate the reason for the discrepancy

- 1      Oversight
- 2      Differences in interpretation of criteria
- 3      Differences in interpretation of study

**Final decision of both reviewers (circle one):**

- 1      STRONG
- 2      MODERATE
- 3      WEAK
